# Supplementary material for: Exercise Rescues Gene Pathways Involved in Vascular Expansion and Promotes Functional Angiogenesis in Subcutaneous White Adipose Tissue
Source: MDPI journal article supplement (doi:10.3390/ijms20082046), 2019-04-25
Supplement: s1 [file s1]

**Supplementary Figure 1:** Exercise to Exhaustion: Mice were exercised to exhaustion and total distance run in meters (M) was recorded (\* p < 0.05 vs ND; # p < 0.05 vs HFD; & p < 0.05 vs ND + Ex).

### Supplementary Figure 1

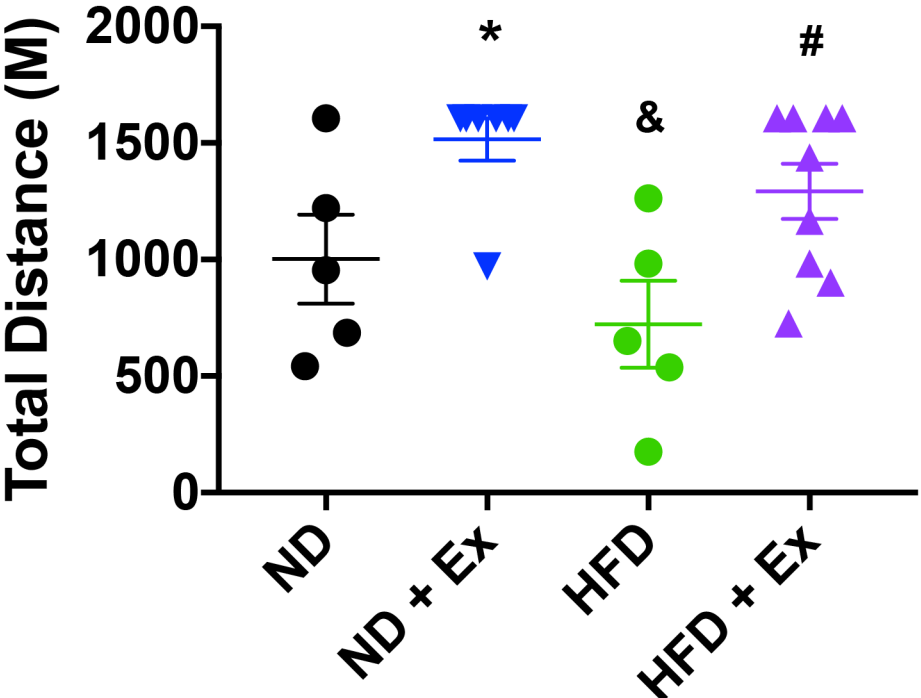

**Supplementary Figure 2:** Exercise improves vascular density but not angiogenic capacity in vWAT. **A:** Maximal intensity projections of 25 epifluorescent images were acquired at 10  $\mu\text{m}$  intervals of isolectin B4 stained sections of scWAT from mice fed ND (top left panel), ND + Ex (top right panel) HFD (bottom left panel) or HFD + Ex (bottom right panel) **B:** Data from the micrographs were quantified to demonstrate vascular density in the scWAT depots. (5 sections/mouse; N = 5 mice/group). **C:** Angiogenic capacity was measured as in Figure 4. Angiogenesis was quantified as area of outgrowth. **D:** Summary data is shown for each mouse. (>25 segments/mouse were assessed (\*p < 0.05 vs ND; # p < 0.05 vs HFD; & p < 0.05 vs ND + Ex).

**A.**

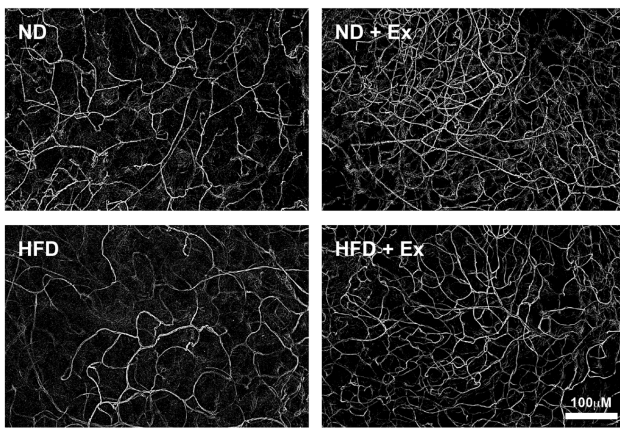

**B.**

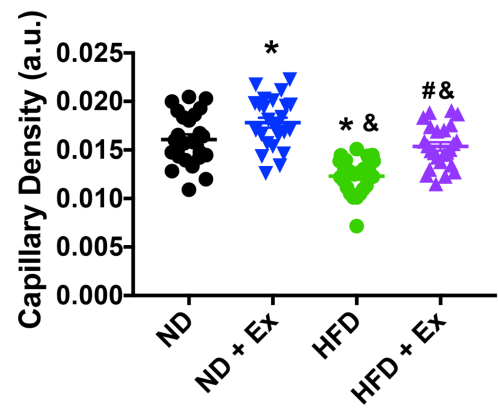

**C.**

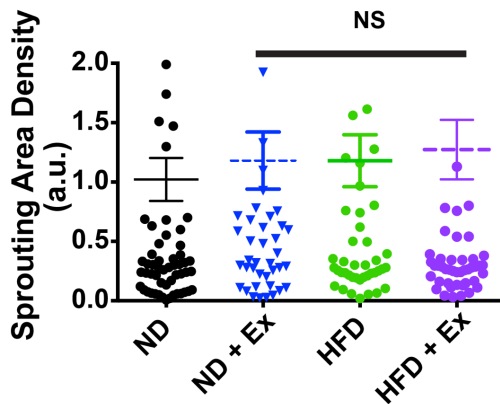

**D.**

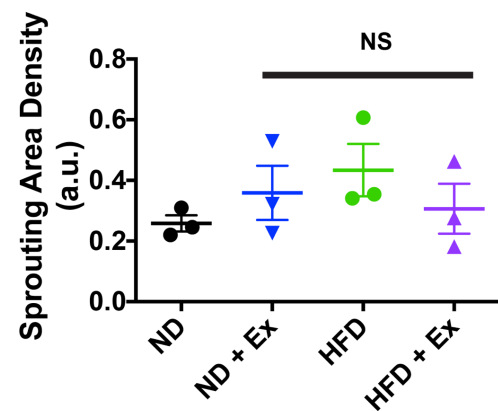

Supplementary Figure 2

**Supplementary Table 1:** The top 10 Ingenuity Pathway Analysis (IPA) defined most enriched biological functions (Disease and Biological Functions) and the directional change of that effect. Pathways negatively influenced by diet and reversed by exercise have been highlighted in red.

| IPA Diseases and Biological Functions                                  |                                   |                 | HFD to ND                  | HFD + Ex to HFD            |
|------------------------------------------------------------------------|-----------------------------------|-----------------|----------------------------|----------------------------|
| <i>Categories:</i>                                                     | <i>Annotation:</i>                | <i>p-value:</i> | <i>Activation z-score:</i> | <i>Activation z-score:</i> |
| Cardiovascular System Development and Function                         | <b>Development of vasculature</b> | 7.61E-16        | <b>-2.254</b>              | <b>1.835</b>               |
| Cellular Movement                                                      | <b>Migration of cells</b>         | 9.2E-16         | <b>-3.462</b>              | <b>3.164</b>               |
| Cardiovascular System Development and Function, Organismal Development | <b>Angiogenesis</b>               | 9.27E-16        | <b>-2.256</b>              | <b>1.837</b>               |
| Organismal Injury and Abnormalities                                    | Benign lesion                     | 3.07E-15        | 0.518                      | -0.876                     |
| Cell Death and Survival                                                | Necrosis                          | 3.06E-14        | -0.029                     | -0.563                     |
| Cellular Movement                                                      | <b>Cell movement</b>              | 3.59E-14        | -3.194                     | 3.13                       |
| Cell Death and Survival                                                | Cell death                        | 6.79E-14        | 0.615                      | -0.843                     |
| Metabolic Disease                                                      | Glucose metabolism disorder       | 8.02E-14        | -0.062                     | -1.18                      |
| Cancer, Organismal Injury and Abnormalities                            | Benign neoplasia                  | 1.11E-13        | 0.926                      | -0.926                     |
| Cardiovascular System Development and Function, Organismal Development | <b>Vasculogenesis</b>             | 2.6E-13         | <b>-2.481</b>              | <b>2.764</b>               |

**Supplementary Table 2: IPA defined upstream growth factors.**

| <b>IPA Upstream Regulator</b> |                            | <b>HFD to ND</b>           | <b>HFD + Ex to HFD</b>     |
|-------------------------------|----------------------------|----------------------------|----------------------------|
| <i>Growth Factors:</i>        | <i>p-value of overlap:</i> | <i>Activation z-score:</i> | <i>Activation z-score:</i> |
| EGF                           | 0.000000774                | -3.31                      | 3.068                      |
| IGF1                          | 0.00000322                 | -2.112                     | 2.5                        |
| FGF2                          | 3.39E-08                   | -1.794                     | 2.152                      |
| TGFA                          | 0.00181                    | -2.025                     | 2.025                      |
| PDGFC                         | 0.0024                     | -1.948                     | 1.948                      |
| CTGF                          | 0.000677                   | -2.586                     | 1.943                      |
| TGFB1                         | 7.17E-19                   | -1.974                     | 1.873                      |
| NGF                           | 0.035                      | -2.675                     | 1.836                      |
| IGF2                          | 0.00259                    | -1.809                     | 1.809                      |
| FGF7                          | 0.0121                     | -1.633                     | 1.633                      |
| AGT                           | 0.000773                   | -2.221                     | 1.596                      |
| BMP2                          | 0.00151                    | -1.497                     | 1.497                      |
| HGF                           | 0.0108                     | -1.932                     | 1.406                      |
| GRP                           | 0.00466                    | -1.257                     | 1.257                      |
| NRG1                          | 0.00141                    | -1.237                     | 1.237                      |
| KITLG                         | 0.0122                     | -1.211                     | 1.211                      |
| VEGFA                         | 0.0159                     | -2.184                     | 1.194                      |
| NOG                           | 0.0132                     | 1.253                      | -1.253                     |
| WISP2                         | 0.000064                   | 1.551                      | -1.551                     |
